# Supplementary material for: Stimulation of natural killer cells with a CD137-specific antibody enhances trastuzumab efficacy in xenotransplant models of breast cancer
Source: JCI journal article supplement (doi:10.1172/jci61226), 2012-02-13
Supplement: sd1 [file 1]

1  
2  
3  
4  
5  
6  
7  
8  
9  
10  
11  
12  
13  
14  
15  
16  
17  
18  
19  
20  
21  
22  
23  
24  
25  
26  
27  
28  
29  
30  
31  
32  
33  
34  
35  
36  
37  
38  
39  
40  
41  
42  
43  
44  
45  
46  
47  
48  
49  
50  
51

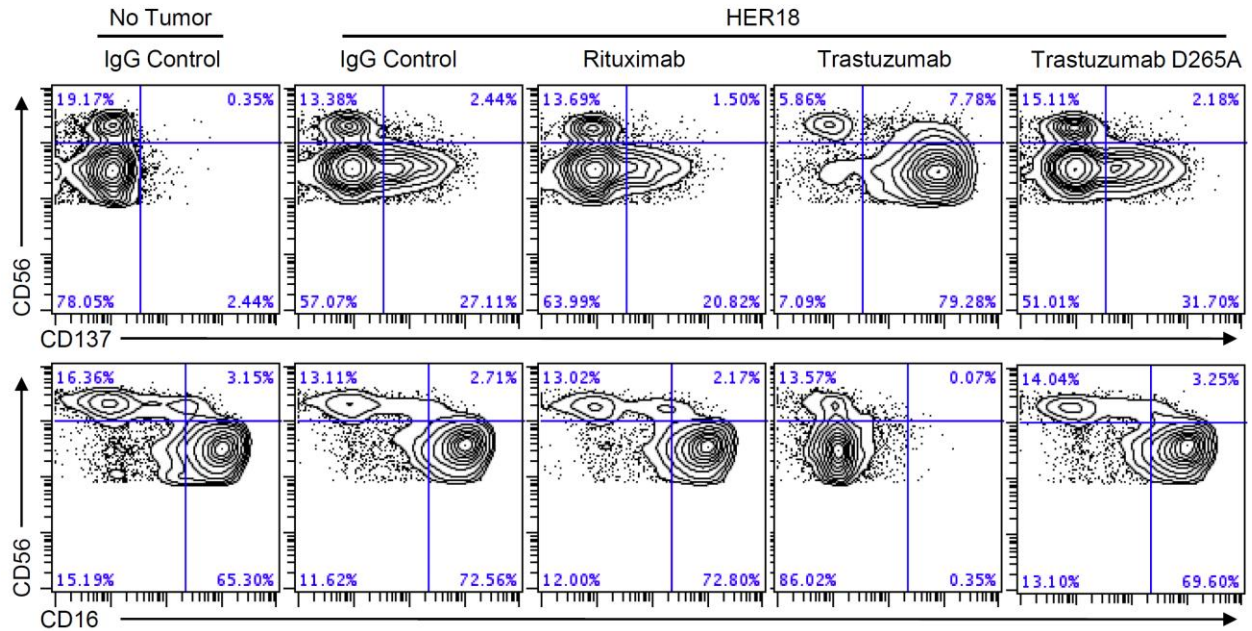

**Supplementary Figure 1**

Trastuzumab induced CD137 upregulation requires Fc-FcγR binding on human NK cells following exposure to HER2-overexpressing tumor cells. Peripheral blood from a healthy donor was analyzed for CD137 expression on CD3<sup>+</sup>CD56<sup>+</sup> NK cells after 24 hour culture with breast cancer cell line, HER18, or no tumor and IgG control, rituximab, trastuzumab, or trastuzumab D265A (D265A mutation prevents Fc-FcγR binding). CD137 and CD16 expression on NK cell subsets cells CD3<sup>+</sup>CD56<sup>bright</sup> and CD3<sup>+</sup>CD56<sup>dim</sup> from a healthy donor after 24 hour culture with IgG control alone, HER18 and IgG control, HER18 and rituximab, HER18 and trastuzumab, and HER18 and trastuzumab D265A is shown.

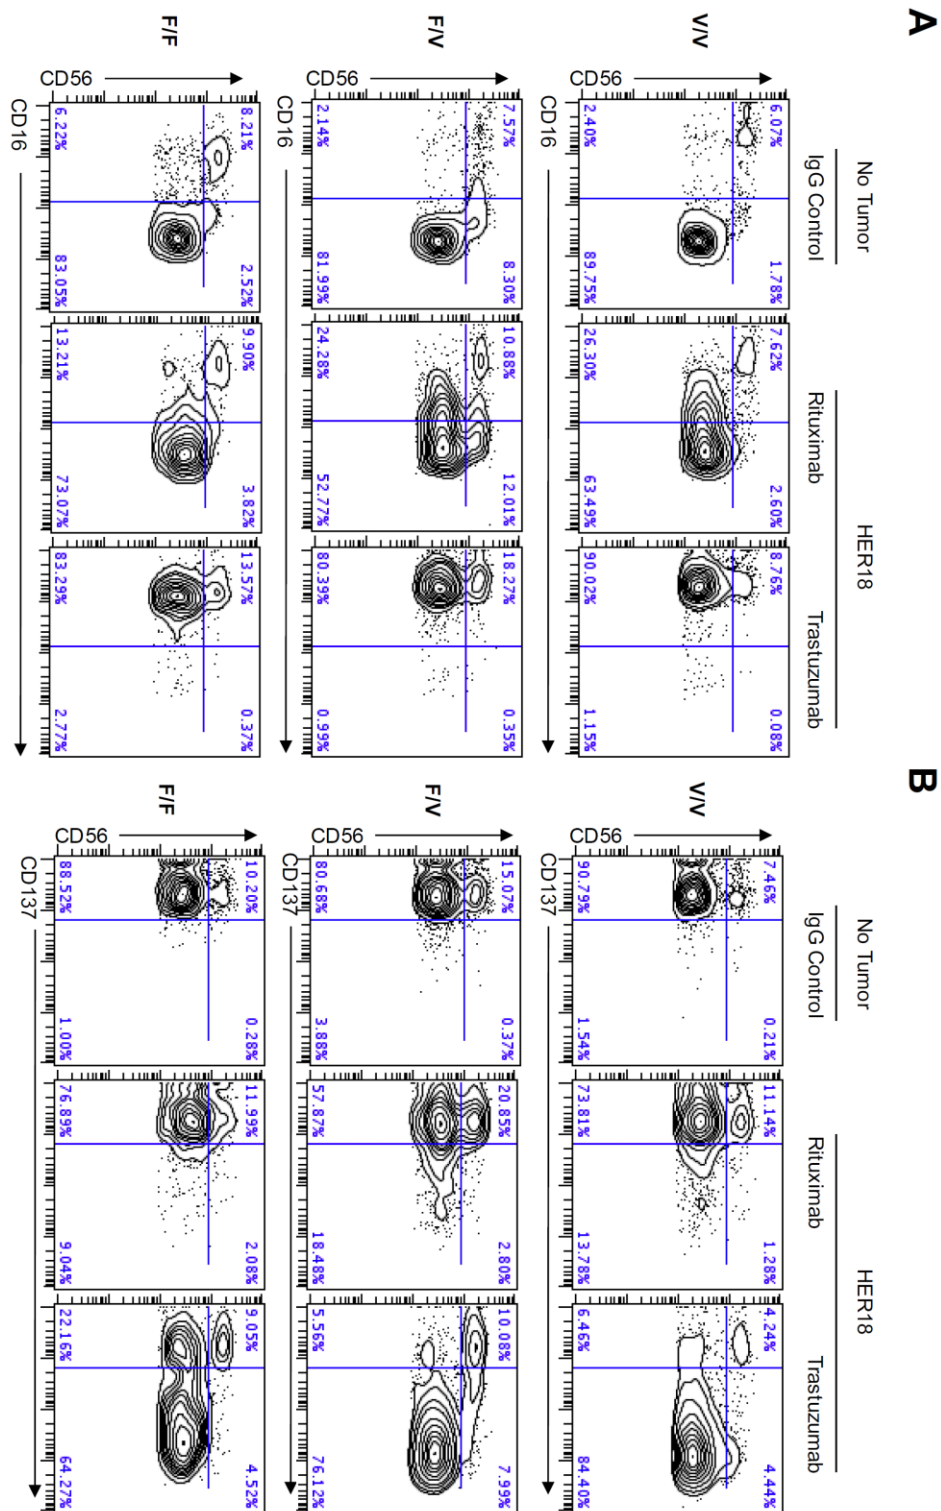

**Supplementary Figure 2**

Genetic polymorphisms with variable FcγRIIIa affinity impact degree of NK cell CD137 expression. Peripheral blood from healthy donors with FcγRIIIa-158 genotypes V/V (high affinity FcγR), V/F, and F/F (low affinity FcγR) was analyzed for CD137 expression on CD3<sup>+</sup>CD56<sup>+</sup> NK cells after 24 hour culture with breast cancer cell line, HER18, or no tumor and IgG control, rituximab, or trastuzumab. (A) shows CD137 expression on NK cell subsets cells CD3<sup>+</sup>CD56<sup>bright</sup> and CD3<sup>+</sup>CD56<sup>dim</sup> from healthy donors after 24 hour culture with IgG control alone, HER18 and rituximab, and HER18 and trastuzumab. (B) shows CD16 expression on NK cell subsets cells CD3<sup>+</sup>CD56<sup>bright</sup> and CD3<sup>+</sup>CD56<sup>dim</sup> from healthy donors after 24 hour culture with IgG control alone, HER18 and rituximab, and HER18 and trastuzumab.

103  
104  
105  
106  
107  
108  
109  
110  
111  
112  
113  
114  
115  
116  
117  
118  
119  
120  
121  
122  
123  
124  
125  
126  
127  
128  
129  
130  
131  
132  
133  
134  
135  
136  
137  
138  
139  
140  
141  
142  
143  
144  
145  
146  
147  
148  
149  
150  
151  
152  
153

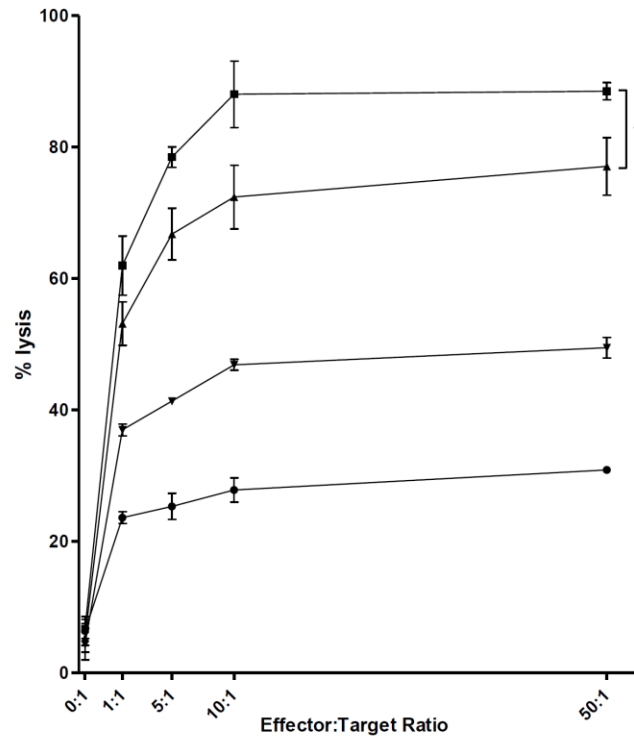

### Supplementary Figure 3

Trastuzumab-mediated cytotoxicity of activated, unpurified NK cells is augmented by anti-CD137 agonistic mAb. NK cells were isolated from healthy PBMCs and cultured for 24 hours together with trastuzumab (10  $\mu\text{g}/\text{mL}$ ) and irradiated (5,000 rads) breast cancer cells (HER18) at a ratio of 1:1. After 24 hours, the activated NK cells were washed and added to chromium-labeled breast cancer cells, HER18, for 4 additional hours in media alone, or with anti-CD137 mAb (BMS-663513, 10  $\mu\text{g}/\text{mL}$ ) alone, trastuzumab (10  $\mu\text{g}/\text{mL}$ ) alone, or trastuzumab plus anti-CD137 mAbs. Shown is percent lysis of target cells by chromium release at varying effector (activated NK cells):target cell ratios cultured with media alone(●), anti-CD137(▼), trastuzumab(▲), or trastuzumab and anti-CD137(■) antibodies (\* $p=0.050$ ).

154  
 155  
 156  
 157  
 158  
 159  
 160  
 161  
 162  
 163  
 164  
 165  
 166  
 167  
 168  
 169  
 170  
 171  
 172  
 173  
 174  
 175  
 176  
 177  
 178  
 179  
 180  
 181  
 182  
 183  
 184  
 185  
 186  
 187  
 188  
 189  
 190  
 191  
 192  
 193  
 194  
 195  
 196  
 197  
 198  
 199  
 200  
 201  
 202  
 203  
 204

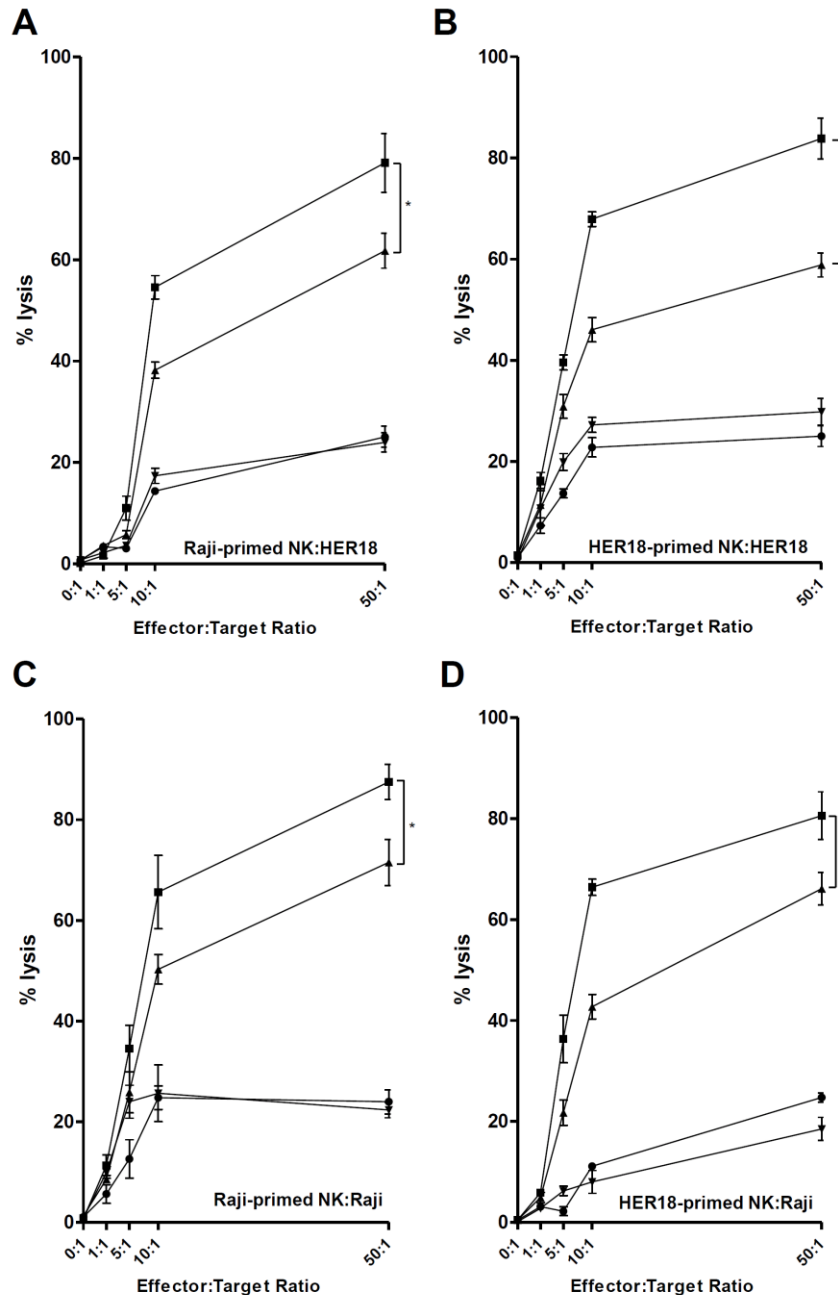

**Supplementary Figure 4**

Enhanced mAb-mediated cytotoxicity of activated NK cells following anti-CD137 agonistic mAb is not restricted to the antibody-coated tumor used to induce NK cell expression of CD137. Healthy PBMCs were cultured for 24 hours together with trastuzumab (10 µg/mL) and irradiated (5,000 rads) HER2-expressing breast cancer cells (HER18, B and D) or with rituximab (10 µg/mL) and irradiated (5,000 rads) CD20<sup>+</sup> lymphoma cells (Raji, A and C) at a ratio of 1:1. After 24 hours, NK cells were isolated by negative selection and assessed for purity (>90% purity as defined by CD3<sup>+</sup>CD56<sup>+</sup> flow cytometry) and activation (>50% expression of CD137). Chromium-labeled breast cancer cell line, HER18 (A and B), or lymphoma cell line, Raji (C and D) were cultured for 4 hours with preactivated, purified NK cells in media alone, or with anti-CD137 mAb (BMS-663513, 10 µg/mL) alone, trastuzumab or rituximab (10 µg/mL) alone, or anti-CD137 plus either trastuzumab or rituximab mAbs (each 10 µg/mL). Shown is percent lysis of target cells by chromium release at varying effector (activated NK cells):target cell ratios cultured with media alone (●), anti-CD137 (▼), trastuzumab (▲), or trastuzumab and anti-CD137 (■) antibodies (A *p* = .046; B \**p* = .006) or with media alone (●), anti-CD137 (▼), rituximab (▲), or rituximab and anti-CD137 (■) antibodies (C \**p* = .048; D \**p* = .049).

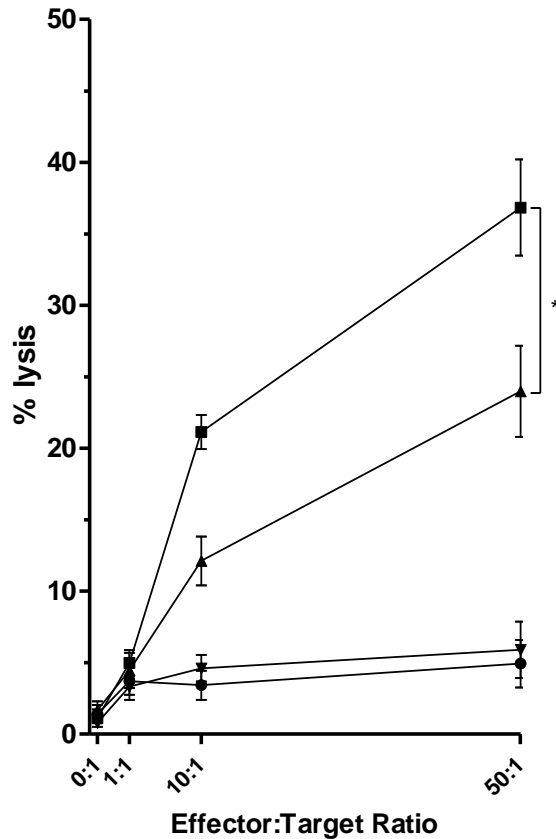

205 **Supplementary Figure 5**  
 206 Anti-CD137 agonistic mAb increases trastuzumab-mediated NK cell cytotoxicity on  
 207 trastuzumab-resistant tumor cells as assayed by chromium release. To evaluate NK cell  
 208 cytolytic function, healthy PBMCs were cultured for 24 hours together with trastuzumab (10  
 209 µg/mL) and irradiated (5,000 rads) breast cancer cells (HCC1659) at a ratio of 1:1. After 24  
 210 hours, NK cells were isolated by negative selection and assessed for purity (>90% purity as  
 211 defined by CD3<sup>+</sup>CD56<sup>+</sup> flow cytometry) and activation (>50% expression of CD137). Chromium-  
 212 labeled breast cancer cell line, HCC1569 were cultured for 4 hours with preactivated, purified  
 213 NK cells in media alone, or with anti-CD137 mAb (BMS-663513, 10 µg/mL) alone, trastuzumab  
 214 (10 µg/mL) alone, or trastuzumab plus anti-CD137 mAbs. Shown is percent lysis of target cells  
 215 by chromium release at varying effector (activated NK cells):target cell ratios cultured with  
 216 media alone(●), anti-CD137(▼), trastuzumab(▲), or trastuzumab and anti-CD137(■) antibodies  
 217 (\*p=.046).  
 218  
 219
